# Supplementary material for: Oxygen-vacancy enhanced CoO/CeO2 heterojunction for synchronous regulation of sulfur resourcing and selenium adsorption separation from flue gas desulfurization wastewater
Source: Royal Society of Chemistry journal article supplement (doi:10.1039/d3ta00341h), 2023-01-01
Supplement: d3ta00341h1.pdf [file d3ta00341h1.pdf]

## Supplementary Material

### Oxygen-Vacancy Enhanced CoO/CeO<sub>2</sub> Heterojunction for Synchronous Regulation of Sulfur Resourcing and Selenium Adsorption Separation from Flue Gas Desulfurization Wastewater

Tieyue Qi<sup>a,b,§</sup>, Xi Chen<sup>a,b,§</sup>, Jingzhao Zhang<sup>a,b</sup>, Jiabin Gao<sup>a,b</sup>, Runlong Hao<sup>a,b,\*</sup>, John Crittenden<sup>c</sup>

*a Hebei Key Laboratory of Power Plant Flue Gas Multi-Pollutants Control, Department of Environmental Science and Engineering, North China Electric Power University, Baoding, 071003, China*

*b MOE Key Laboratory of Resources and Environmental Systems Optimization, College of Environmental Science and Engineering, North China Electric Power University, Beijing, 102206, China*

*c Brook Byer Institute for Sustainable Systems and School of Civil and Environmental Engineering, Georgia Institute of Technology, Atlanta, Georgia 30332, United States;*

*§ indicates the co-first author.*

*\* Corresponding authors E-mail: hrl\_ncepu@hotmail.com*

Submitted to  
Journal of Materials Chemistry A

Number of pages (including this page): 42

Number of texts: 6

Number of figures: 20

Number of tables: 11

## Texts

### Text S1 Chemicals and materials

All reagents were used directly without further purification. Cobalt nitrate hexahydrate ( $\text{Co}(\text{NO}_3)_2 \cdot 6\text{H}_2\text{O}$ , 99%, Macklin Co., China.) and urea ( $\text{H}_2\text{NCONH}_2$ , 99%, Kermel Co., China.) were used to synthesize cobalt carbonate via hydrothermal method. Cerium nitrate ( $\text{Ce}(\text{NO}_3)_2 \cdot 6\text{H}_2\text{O}$ , 99%, Macklin Co., China.) and polyvinylpyrrolidone (PVP, 99%, Kermel Co., China.) were used to synthesize  $\text{CoO}/\text{CeO}_2$  catalysts. In addition, ethanol ( $\text{C}_2\text{H}_5\text{OH}$ , 99.7%, Damao Technology Co., China) and deionized (DI) water obtained from Milli-Q ultrapure water purification system (Millipore, Billerica, MA) were used as washing solution. Sodium borohydride ( $\text{NaBH}_4$ , 99%, Damao Technology Co., China.) was used to establish oxygen vacancies on the catalysts. Sulfite ( $\text{Na}_2\text{SO}_3$ , 97%, Damao Technology Co., China.) and selenium (Se, 1000ug/mL in 2.0 mol/L  $\text{HNO}_3$ , Aladdin Co., China.) were used as the target pollutants. HCl (36-38%wt, Damao Co. Technology Co., China.), thiourea ( $\text{CH}_4\text{N}_2\text{S}$ , 99%, Kermel Co., China.) and L-ascorbic acid (99.7%, Kermel Co., China.) were used as the reducing solution to when testing the concentration of Se. Sodium hydroxide ( $\text{NaOH}$ , 99%, Damao Co. Technology Co., China.) and HCl were used to adjust the pH of mixture solution. A commercial polytetrafluoroethylene (PTFE) microfiltration membrane ( $\Phi=50$  mm, pore diameter=0.45  $\mu\text{m}$ ) was used to collect products by filtration.

## Text S2. Adsorption Kinetics

To reveal the behavior and mechanism of Se adsorption, the Se adsorption kinetics were further studied based on the pseudo-first-order model, pseudo-second-order model and intra-particle diffusion model.<sup>1-3</sup> The related parameters are summarized in Table S2. The fitting result shown in Fig. S3 indicates that the pseudo-first-order model is not fit. By contrast, as shown in Fig. S4, the regression coefficients ( $R^2$ ) of the pseudo-second-order fitting curve for all materials are close to 1, and the  $q_{e,cal}$  values are well agree with the experimental  $q_e$  values, demonstrating that pseudo-second-order model is competent to describe the adsorption kinetics of Se.

In addition, the intra-particle diffusion model was also employed to determine the rate-determining step in Se adsorption process. As shown in Fig. S5, the Se adsorption process can be divided into three linearity plots, i.e. external transfer step, intra-particle diffusion step and final equilibrium step<sup>4-6</sup>; and the plots of  $q_t$  against  $t^{1/2}$  are straight lines passing through the origin, indicating that the rate-determining step is pore diffusion rather than boundary layer diffusion<sup>2,4</sup>.

$$\frac{1}{q_t} = \frac{k_1}{q_{e1}t} + \frac{1}{q_{e1}} \quad (1)$$

$$\frac{t}{q_t} = \frac{1}{(k_2 q_{e2}^2)} + \frac{t}{q_{e2}} \quad (2)$$

$$q_t = k_{id}t^{1/2} + I \quad (3)$$

where  $k_1$  and  $k_2$  are the pseudo-first-order constant and pseudo-second-order constant, respectively;  $R^2$  is the linear correlation coefficient;  $q_e$  ( $\text{mg} \cdot \text{g}^{-1}$ ) represents the adsorption capacity of the adsorbent at equilibrium;  $q_t$  ( $\text{mg} \cdot \text{g}^{-1}$ ) is the adsorption capacity of the adsorbent at time  $t$ ;  $K_{id}$  ( $\text{mg} \cdot \text{g}^{-1} \cdot \text{min}^{-1/2}$ ) denotes the intra-particle diffusion rate constant; and  $I$  is the intercept of the intra-particle diffusion model.

### Text S3. Adsorption Isotherm

To further determine the adsorption capacity of Se, the adsorption isotherms were established according to the Langmuir and Freundlich isotherm models, with the initial concentration of Se ranging from 0 to 200 mg/L. Table S4 summarizes the parameters of Langmuir and Freundlich isotherms. As shown in Fig. S6, Se adsorption capacity increases constantly with the increase in equilibrium concentration ( $C_e$ ), and reaches saturation in the end, with the maximum adsorption capacity of higher than 120 mg/g. Moreover, the  $R^2$  of Freundlich model is higher than that of Langmuir model, so Se adsorption process follows the Freundlich model. Herein, the fitting results of kinetic and isotherm adsorption curves suggested that the mechanism of Se adsorption was involved with chemisorption on multilayers<sup>5</sup>.

$$q_e = \frac{q_{max}K_L C_e}{1 + K_L C_e} \quad (4)$$

$$q_e = K_F C_e^{1/n} \quad (5)$$

where  $C_e$  ( $\text{mg}\cdot\text{L}^{-1}$ ) represents the equilibrium concentration of Se in solution;  $q_e$  ( $\text{mg}\cdot\text{g}^{-1}$ ) is the amount of adsorbed Se per unit mass of the 70 wt% OV-CoO/CeO<sub>2</sub> composite material;  $K_L$  ( $\text{L}\cdot\text{mg}^{-1}$ ) denotes Langmuir affinity constant related to the energy of adsorption;  $q_{max}$  ( $\text{mg}\cdot\text{g}^{-1}$ ) is the maximum adsorption capacity;  $K_F$  ( $\text{mg}/\text{g}\cdot(\text{L}/\text{mg})^{1/n}$ ) represents the Freundlich constant related to the adsorption affinity; and  $n$  is a dimensionless indicator related to the adsorbent surface heterogeneity.

The Dubinin-Radushkevich (D-R) isotherm model was used to determine whether the nature of the process of adsorption is physical or chemical<sup>7, 8</sup>. The equation of the D-R isotherm is expressed by eq (6).

$$\ln q_e = \ln Q_0 - \beta \varepsilon^2 \quad (6)$$

Where  $q_e$  ( $\text{mg}\cdot\text{g}^{-1}$ ) is the amount of adsorbed Se per unit mass of the OV-CoO/CeO<sub>2</sub> composite material;  $Q_0$  ( $\text{mg}\cdot\text{g}^{-1}$ ) denotes the maximum adsorption capacity;  $\beta$  represents the activity coefficient related to the mean free energy of adsorption ( $\text{mol}^2/\text{J}^2$ ); and  $\varepsilon$  is the Polanyi potential ( $\varepsilon = RT\ln(1 + 1/C_e)$ ). The calculated  $q_m$

and  $\beta$  are listed in Table S5. The mean free energy of adsorption  $E$  (kJ/mol) is expressed by eq (7):

$$E = \frac{1}{\sqrt{2\beta}} \quad (7)$$

According to the former reports, the adsorption mechanism can be determined by the value of  $E$ . When the values of  $E$  between 8 to 16 kJ/mol, the process of adsorption belongs to chemical adsorption<sup>9</sup>.

In HSDM, the adsorbent particle is assumed as a sphere which is surrounded by a stagnant liquid boundary layer, and the adsorbed adsorbate molecules are supposed to transport through diffusion on the surface of pore within the adsorbent particles<sup>10</sup>. In addition, during the migration process, it is assumed that a local equilibrium is established instantaneously between the adsorbate in the pore fluid and the adsorbate on the pore surface<sup>11</sup>. The rate data can be used to calculate the  $C$  data value at different time  $t$  to determine the surface diffusion coefficient, which is expressed as eq(8):

$$C_{data} = \frac{Ct - Ce}{C_0 - Ce} \quad (8)$$

The value of  $t_{bar}$  can be calculated by the eq(9):

$$t_{bar} = D_s \frac{t}{R^2} \quad (9)$$

The Excel solver is used to find the optimal  $Ds/R^2$  value by minimizing the objective function as shown in the eq(10):

$$OF = \sqrt{\frac{\sum_{i=1}^n \left( \frac{C_{data,i} - C_{model,i}}{C_{data,i}} \right)^2}{n-1}} \quad (10)$$

The equation of the general empirical relationship is expressed by eq(11), which expresses the dimensionless concentration as a function of dimensionless time.

$$C = A_0 + A_1 (\ln t) + A_2 (\ln t)^2 + A_3 (\ln t)^3 \quad (11)$$

According to Freundlich model, the Freundlich constant related to the adsorption affinity  $K_F$  (mg/g·(L/mg)<sup>1/n</sup>) is 10.45 and the dimensionless indicator related to the adsorbent surface heterogeneity  $1/n$

is

0.49.

#### Text S4

In this study, the turnover frequency (TOF ( $\text{s}^{-1}$ )) was used to measure the amount of oxidized sulfite per mol of Co atom per second<sup>1</sup>. The amount of active substance in this study was determined by the content of active component in catalyst. The TOF was calculated as follows:

$$TOF = \frac{n_{S(VI)}}{n_{active} \times t} \quad (12)$$

Where  $n_{S(VI)}$  (mol) is the amount of sulfate in oxidation products;  $n_{active}$  (mol) is the content of metal active component on catalyst and  $t$  (s) is the reaction time.

## Text S5

The material cost in the reported literatures was calculated as follows:

$$C = \frac{\sum_{i=1}^n m_{precursor,i} \times c_{precursor,i}}{m_{adsorbent} \times q_e} \quad (13)$$

Where  $C$  ( $\text{\$}\cdot\text{t}^{-1}$ ) is cost of adsorbent required for each ton of Se;  $i$  is one of the precursors contained in the material;  $m_{precursor}$  (g) is the required mass of the precursor;  $c_{precursor}$  ( $\text{\$}\cdot\text{t}^{-1}$ ) is the price per ton of the precursor;  $m_{adsorbent}$  (g) is the mass of the prepared adsorbent;  $q_e$  ( $\text{mg}\cdot\text{g}^{-1}$ ) is the amount of adsorbed Se per unit mass of the adsorbent material.

## Text S6

The synergistic catalytic/adsorption experiments were performed in simulated WFGD slurry to investigate the S/Se selectivity of OV-CoO/CeO<sub>2</sub>. The S selectivity ( $S_s$ ) and Se selectivity ( $S_{se}$ ) are calculated as follows:

$$S_s = \frac{TOF_{SW}}{TOF_{C/A}} \quad (14)$$

Where  $TOF_{SW}$  is the turnover frequency of OV-CoO/CeO<sub>2</sub> for SO<sub>3</sub><sup>2-</sup> oxidation in simulated WFGD slurry with impurities.  $TOF_{C/A}$  is the turnover frequency of OV-CoO/CeO<sub>2</sub> for SO<sub>3</sub><sup>2-</sup> oxidation under simultaneous SO<sub>3</sub><sup>2-</sup> catalytic oxidation and Se adsorption in pure environment.

$$S_{se} = \frac{R_{SW}}{R_{C/A}} \quad (15)$$

Where  $R_{SW}$  is the Se removal efficiency of OV-CoO/CeO<sub>2</sub> in simulated WFGD slurry with impurities.  $R_{C/A}$  is the Se removal efficiency of OV-CoO/CeO<sub>2</sub> under simultaneous SO<sub>3</sub><sup>2-</sup> catalytic oxidation and Se adsorption in pure environment.

## Figures

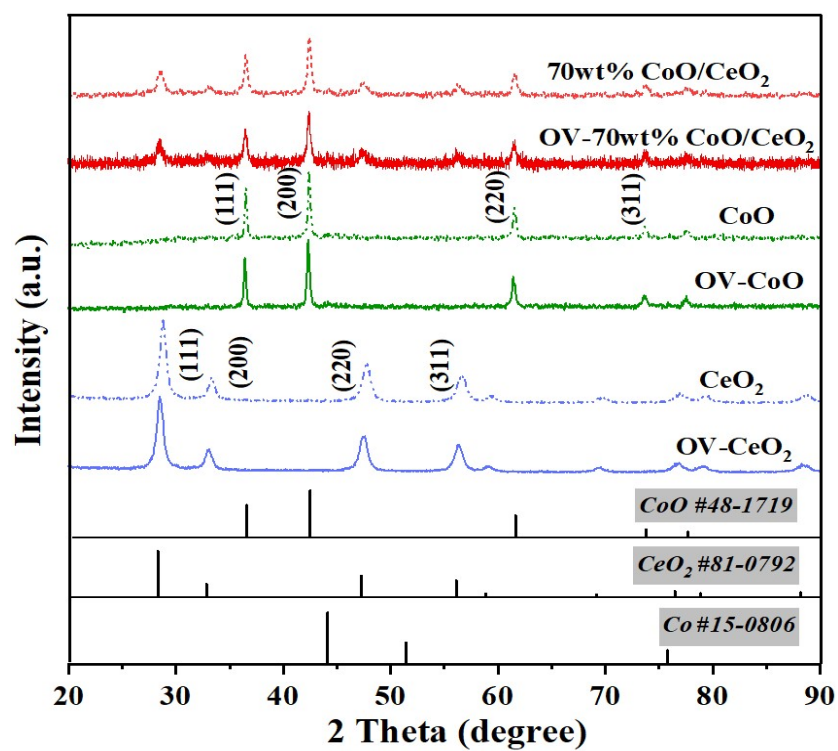

**Fig. S1.** XRD patterns of CoO, OV-CoO, CeO<sub>2</sub>, OV-CeO<sub>2</sub>, CoO/CeO<sub>2</sub> and OV-CoO/CeO<sub>2</sub> catalysts.

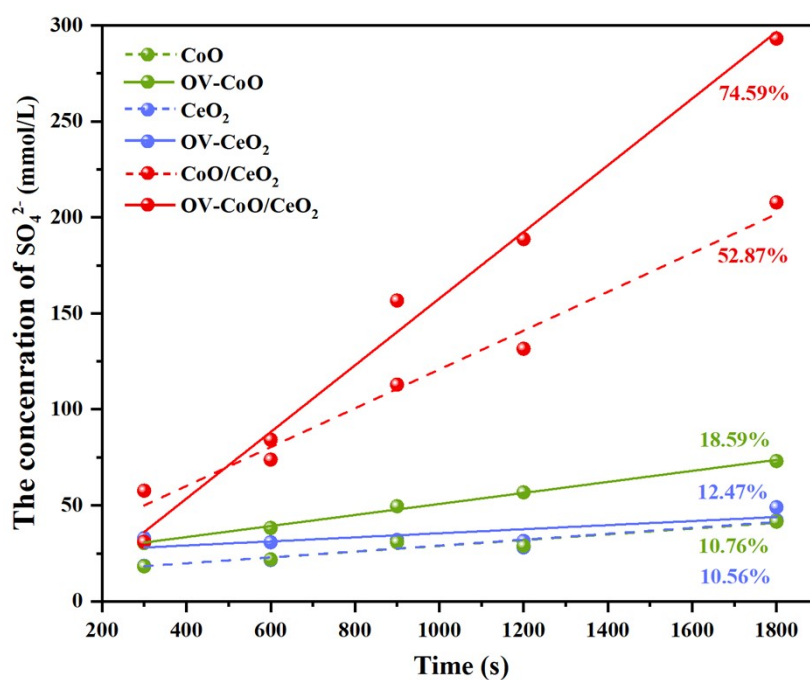

**Fig. S2.** Kinetics and efficiencies of sulfite oxidation by using CoO, CeO<sub>2</sub>, CoO/CeO<sub>2</sub> materials with and without OV. General conditions:  $c_{\text{cat}} = 0.5 \text{ g/L}$ ,  $c_{(\text{NaSO}_3)} = 2 \text{ g/L}$ ,  $P_{\text{O}_2} = 0.21 \text{ atm}$ ,  $T = 318 \text{ K}$ , and  $\text{pH} = 8.0$ .

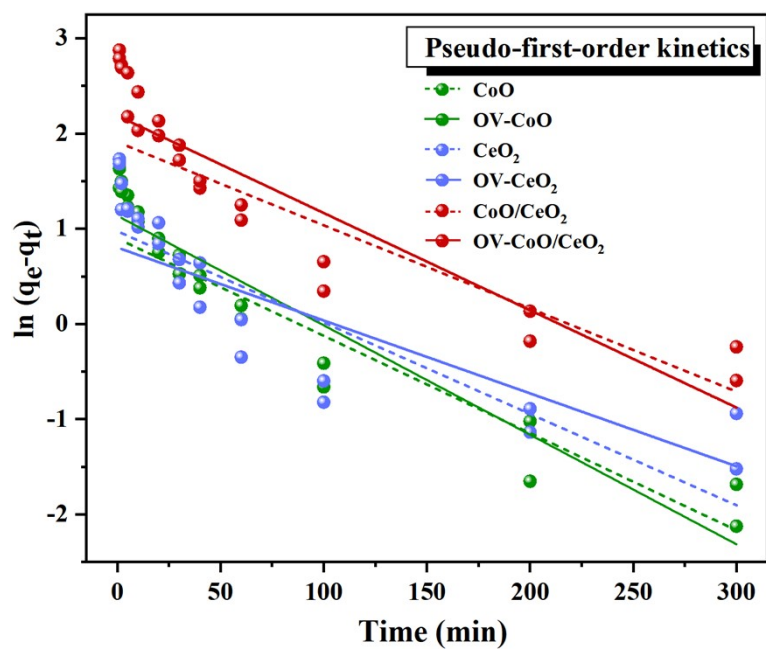

**Fig. S3.** Pseudo-first-order kinetics fitting curve for selenium adsorption.

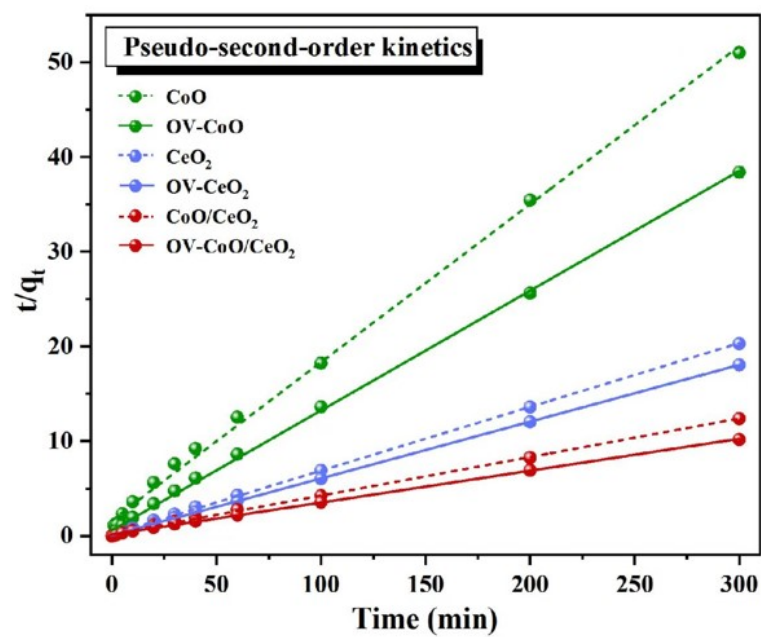

**Fig. S4.** Pseudo-second-order kinetics fitting curve for selenium adsorption.

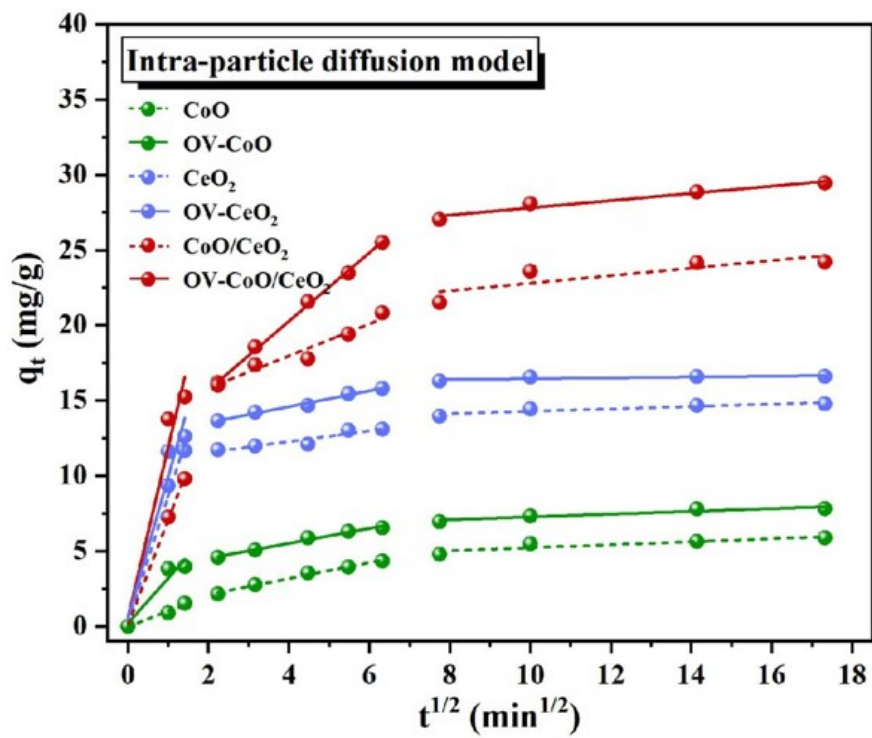

**Fig. S5.** Intra-particle diffusion model fitting curve for selenium adsorption.

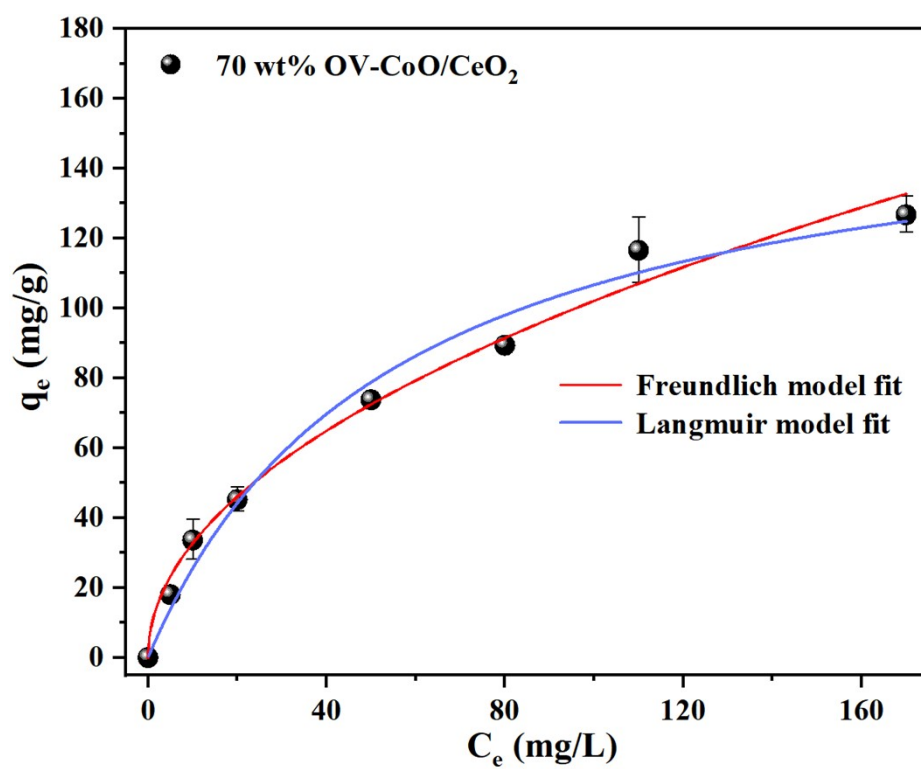

**Fig. S6.** Langmuir and Freundlich isotherm fitting parameters models for Se adsorption on OV-CoO/CeO<sub>2</sub>.

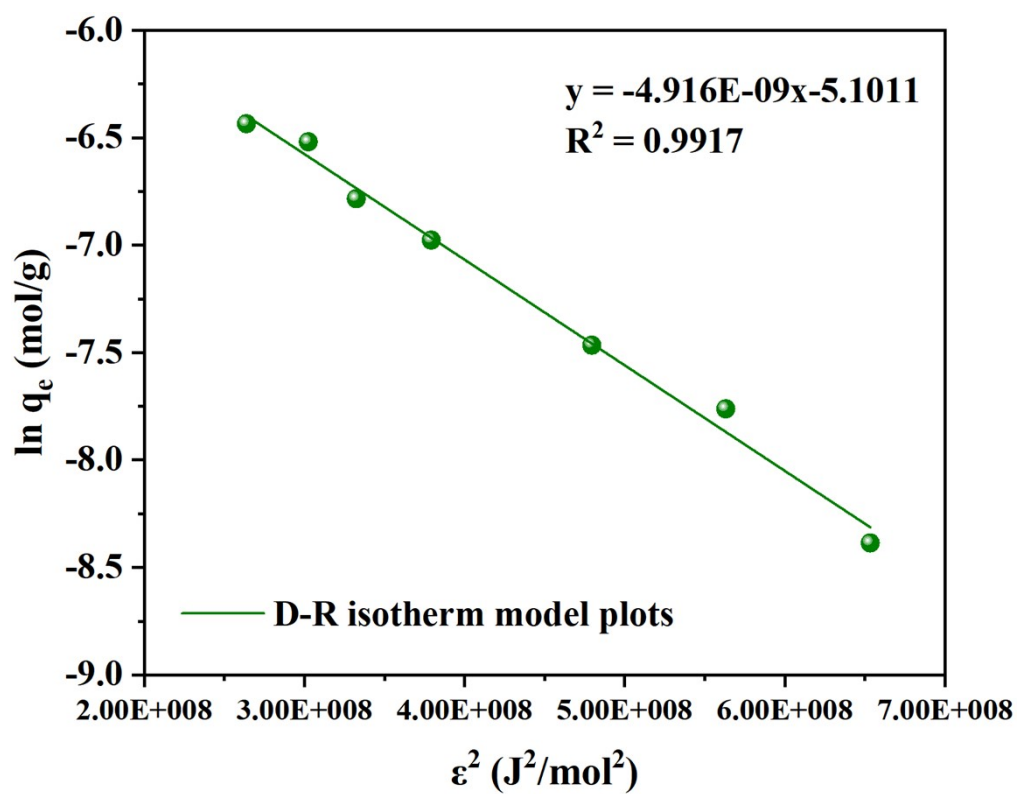

**Fig. S7.** Dubinin-Radushkevich model parameters for Se adsorption onto 70 wt% OV-CoO/CeO<sub>2</sub>.

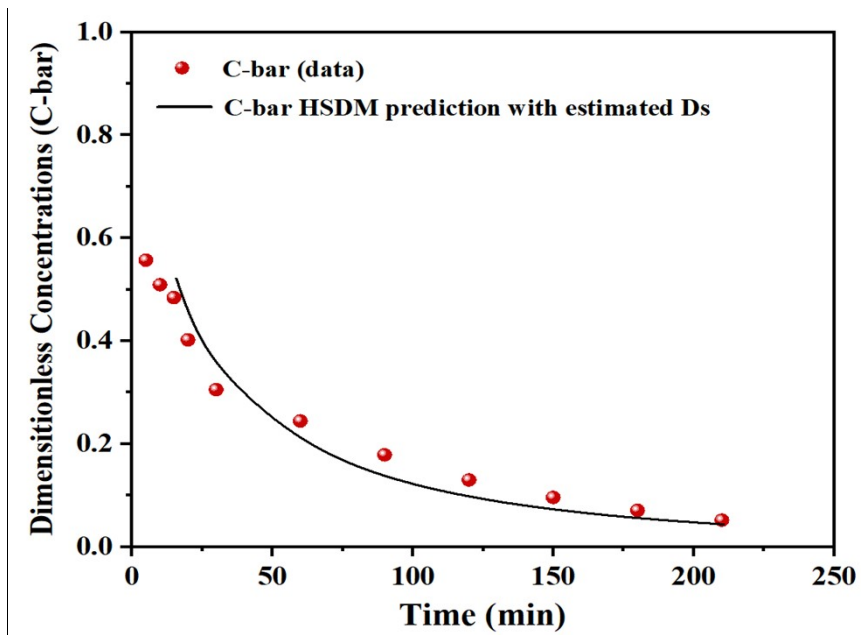

**Fig. S8.** Experimental data and HSDM prediction calculated by using  $D_s$ .

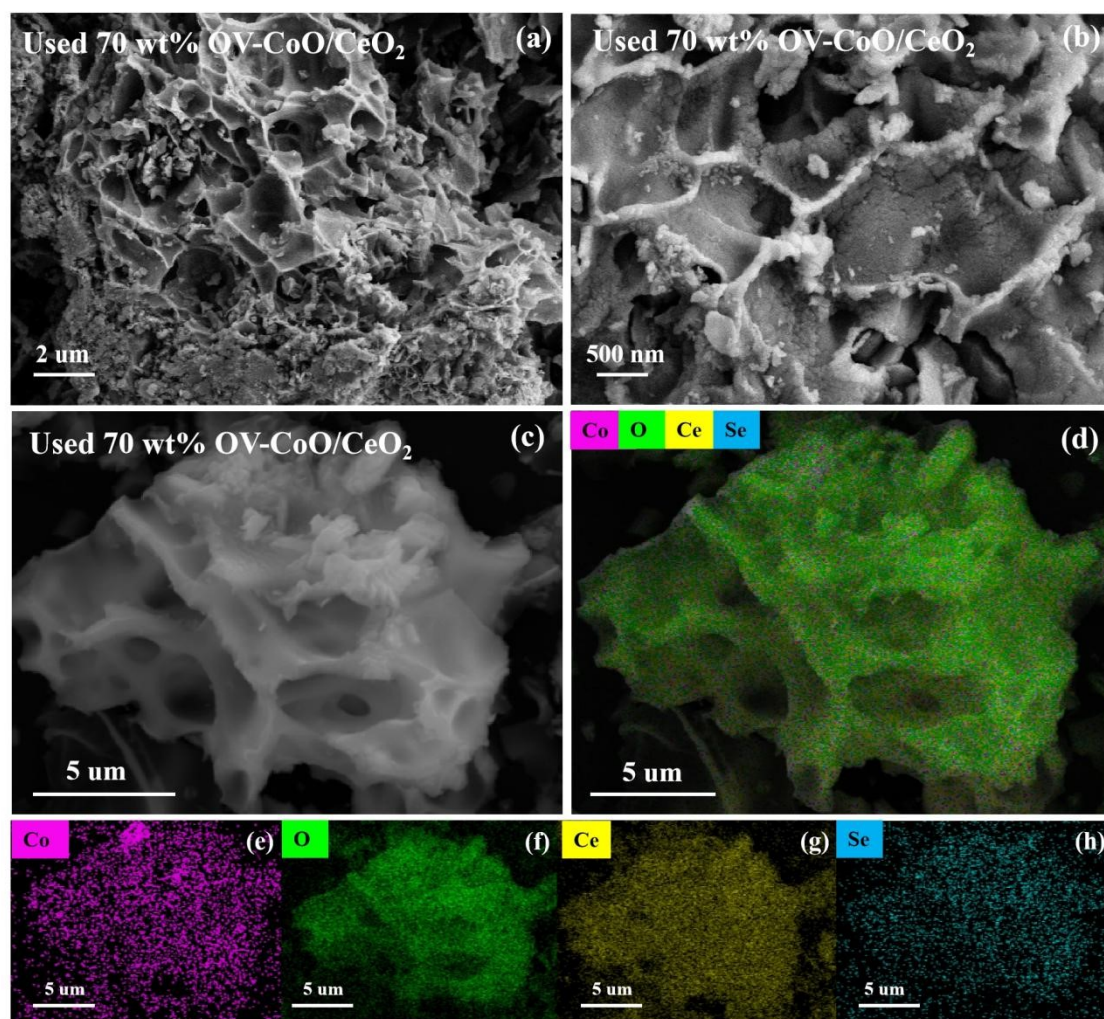

**Fig. S9.** SEM images and elemental mapping of the used OV-CoO/CeO<sub>2</sub>

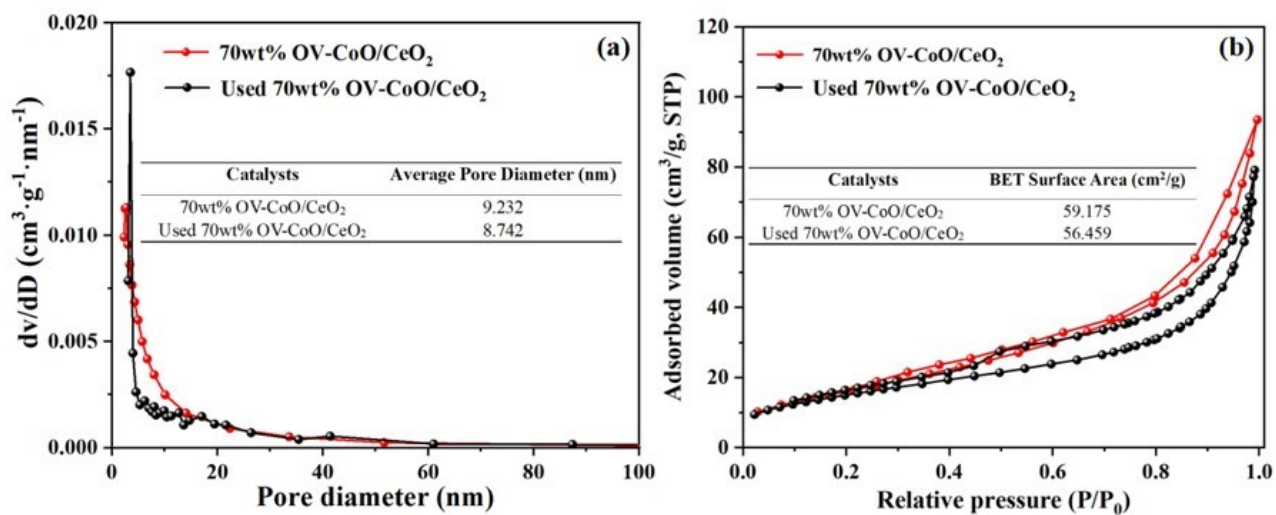

**Fig.S10.** (a) Pore diameter distribution of the used OV-CoO/CeO<sub>2</sub> (b) Nitrogen adsorption-desorption isotherms of the used OV-CoO/CeO<sub>2</sub>

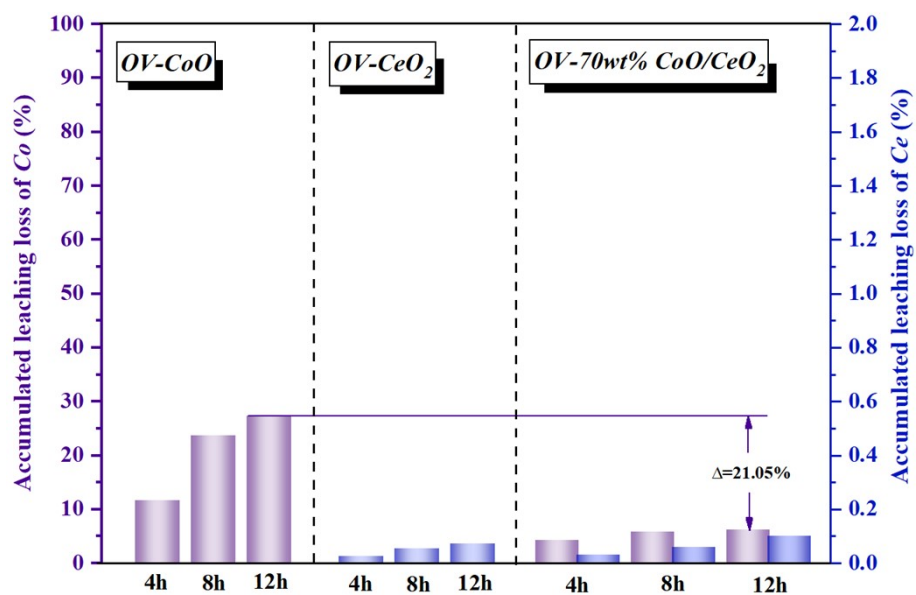

**Fig. S11.** Comparison of Co and Ce losses in sulfite oxidation by using CoO, CeO<sub>2</sub>, CoO/CeO<sub>2</sub>.

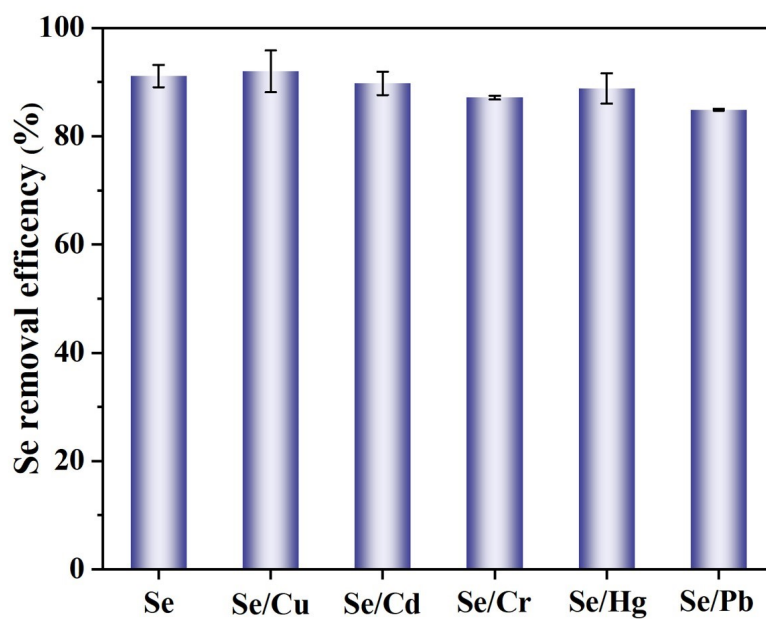

**Fig. S12.** Effects of coexisted toxic metals on selenium removal efficiency.  $c_{Cr}=5$  mg/L,  $c_{Cu}=0.5$  mg/L,  $c_{Hg}$   
 $= 0.2$ mg/L,  $c_{Pb} = c_{Se}$  1mg/L,  $c_{Cd} = 0.1$ mg/L.

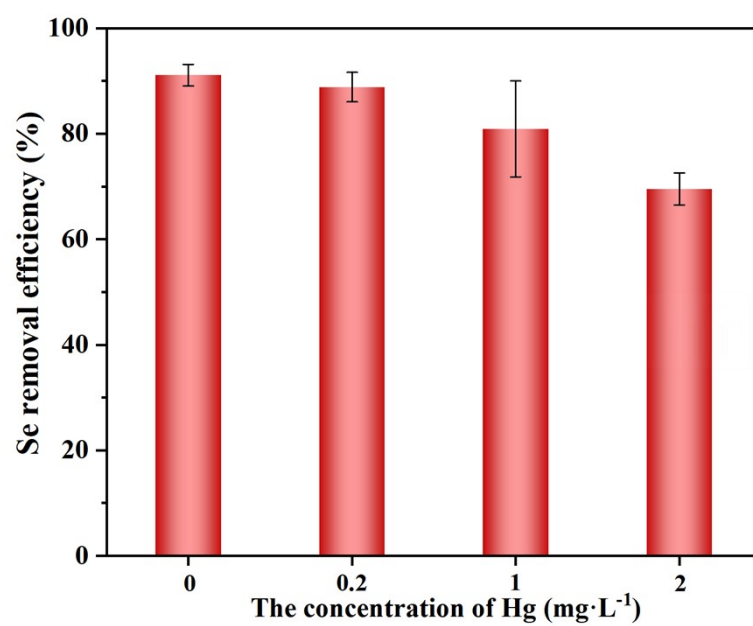

**Fig. S13.** Effect of Hg on Se adsorption

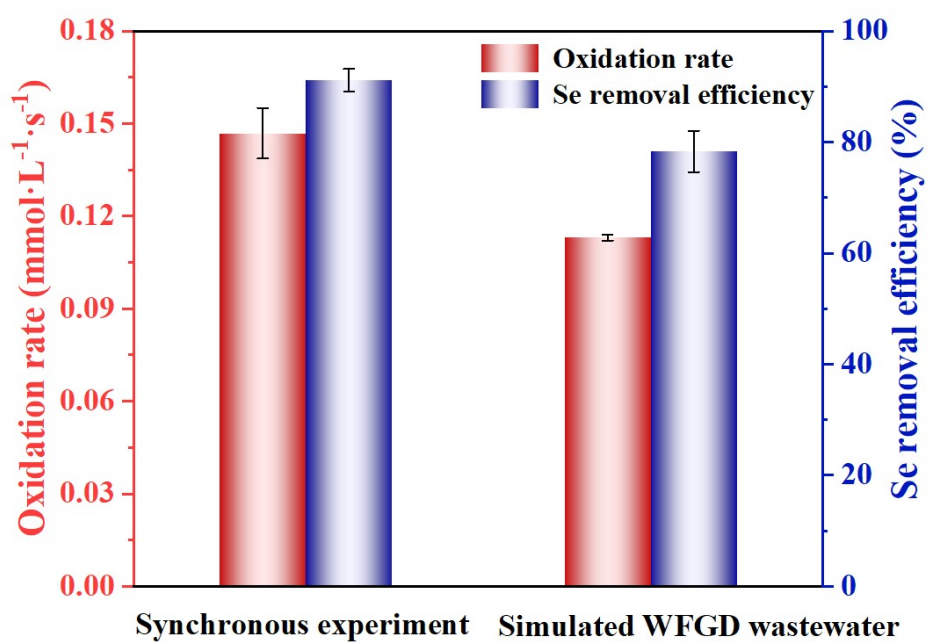

**Fig. S14.** Catalytic/adsorption performance of OV-CoO/CeO<sub>2</sub> in simulated WFGD wastewater

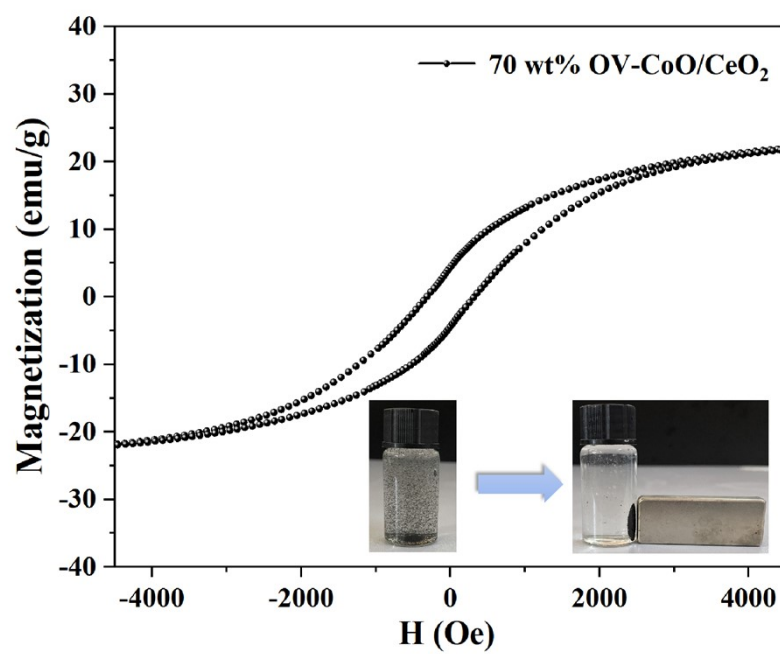

**Fig. S15.** M-H hysteresis curves of the 70 wt% OV-CoO/CeO<sub>2</sub> catalyst.

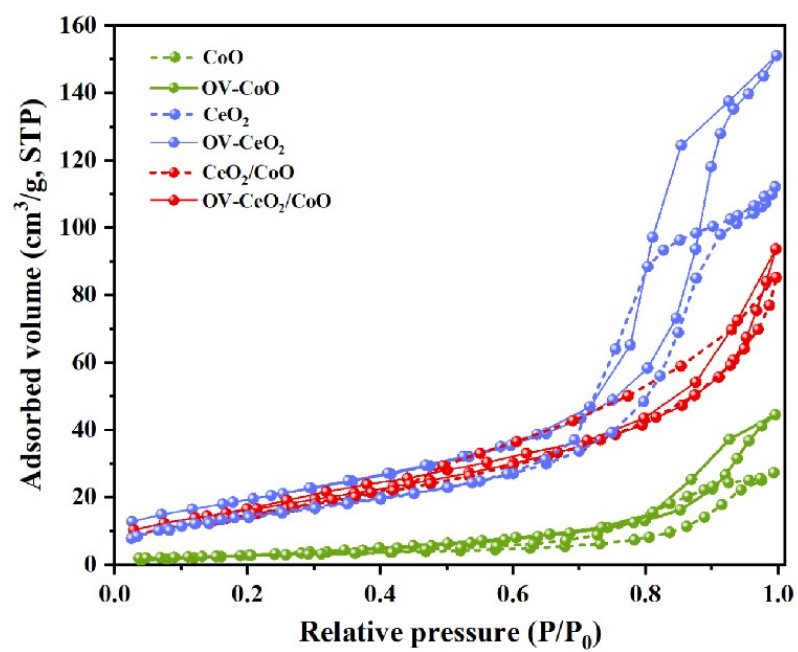

**Fig. S16.** Nitrogen adsorption-desorption isotherms of the different materials.

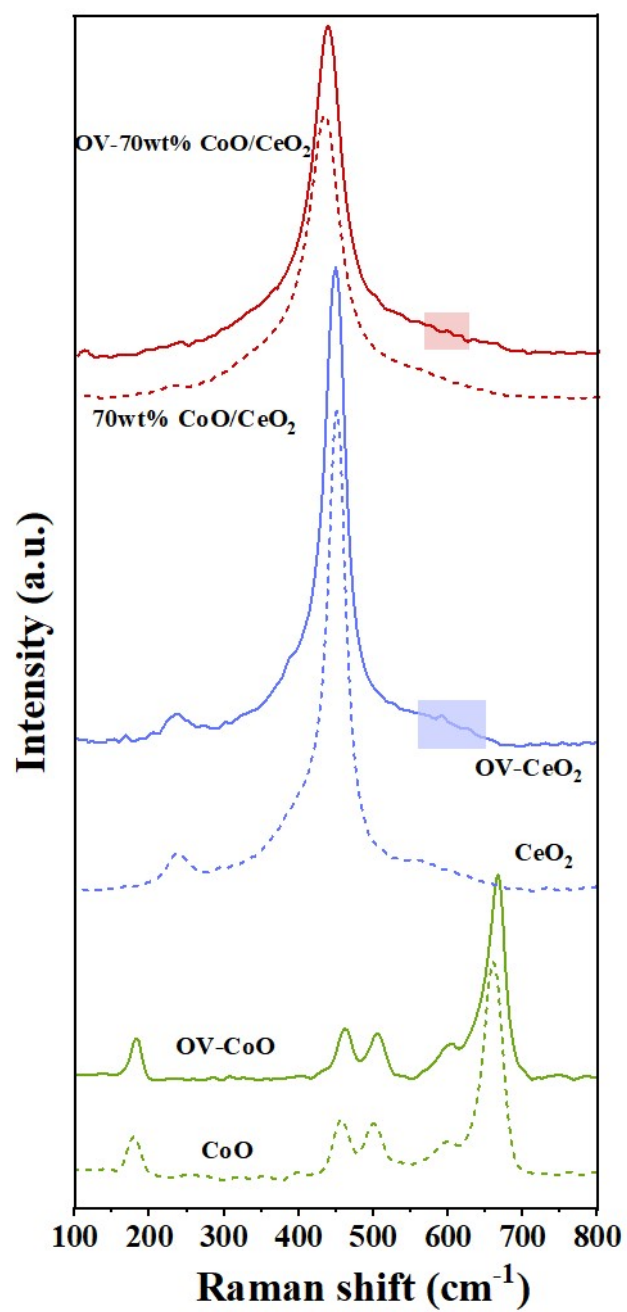

**Fig. S17.** Raman spectra of CoO, CeO<sub>2</sub>, CoO/CeO<sub>2</sub> materials with and without OV.

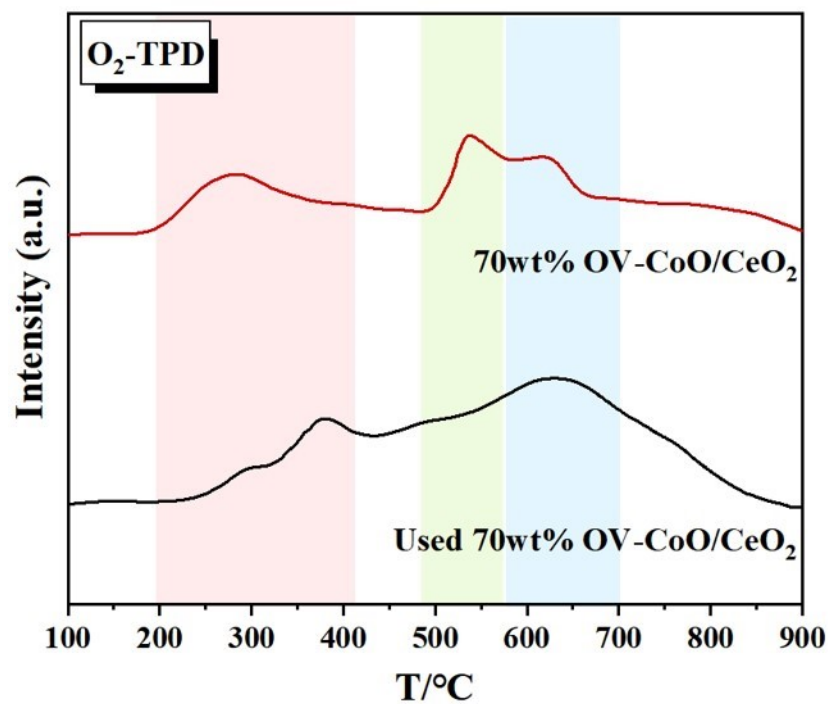

**Fig.S18.** Comparison of the TPD profiles between used OV-CoO/CeO<sub>2</sub> and fresh OV-CoO/CeO<sub>2</sub>

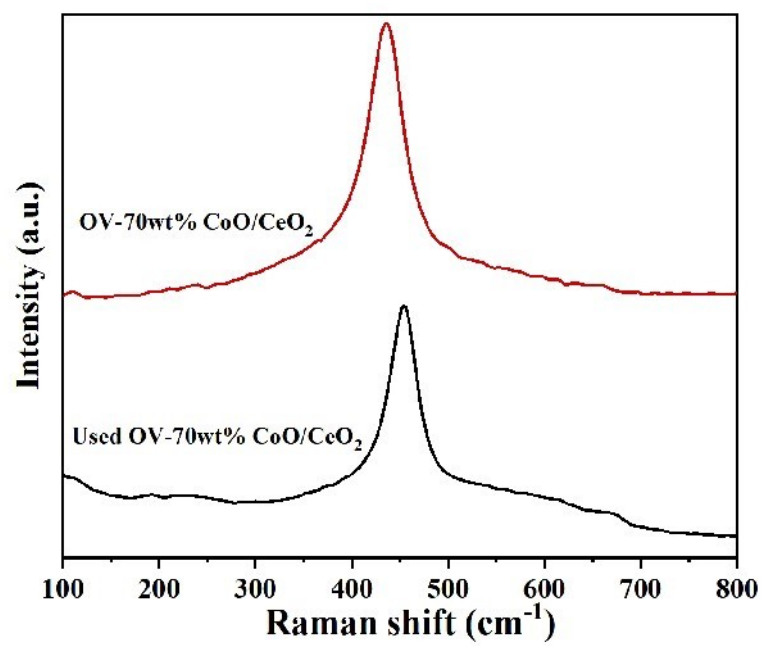

**Fig. S19.** Comparison of the Raman spectra between used OV-CoO/CeO<sub>2</sub> and fresh OV-CoO/CeO<sub>2</sub>

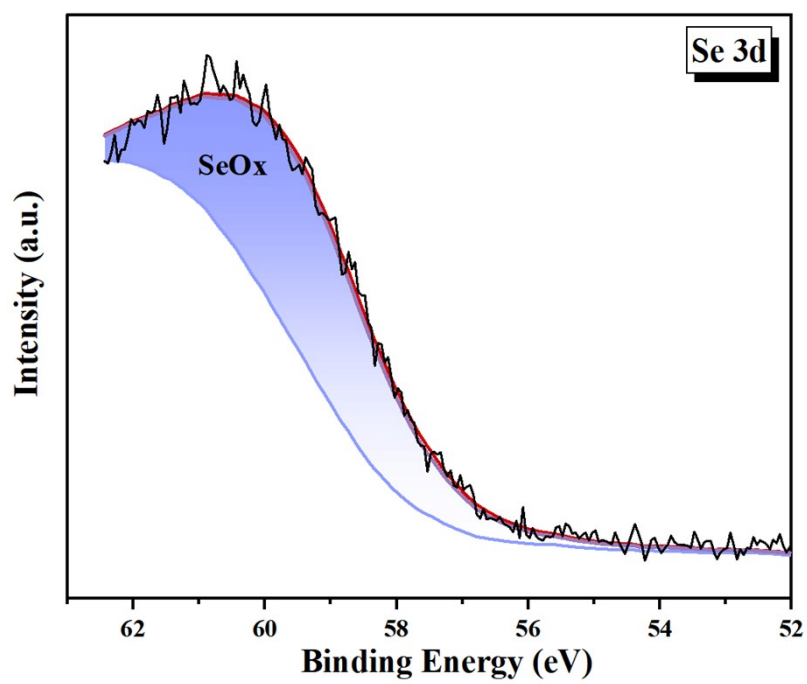

**Fig. S20.** Se 3d XPS spectra of OV-CoO/CeO<sub>2</sub> after Se adsorption.

## Tables

**Table S1** Comparison of the TOF for other Co-based catalysts

| Catalysts                                    | Catalyst dosage (g·L <sup>-1</sup> ) | Co concentration (wt.%) | Oxidation rate of SO <sub>3</sub> <sup>2-</sup> (mmol·L <sup>-1</sup> ·s <sup>-1</sup> ) | TOF (s <sup>-1</sup> ) | References       |
|----------------------------------------------|--------------------------------------|-------------------------|------------------------------------------------------------------------------------------|------------------------|------------------|
| <b>Mn@ZIF67</b>                              | 0.50                                 | 18.07                   | 0.077                                                                                    | 0.014                  | 12               |
| <b>Co/C<sub>3</sub>N<sub>4</sub></b>         | 0.50                                 | 24.10                   | 0.074                                                                                    | 0.010                  | 13               |
| <b>Co-MOF-74</b>                             | 0.50                                 | 29.59                   | 0.081                                                                                    | 0.009                  | 14               |
| <b>Co<sub>3</sub>O<sub>4</sub>-NPs@KIT-6</b> | 1.00                                 | 4.00                    | 0.0902                                                                                   | 0.038                  | 15               |
| <b>BISC</b>                                  | 1.00                                 | 13.32                   | 0.1446                                                                                   | 0.018                  | 16               |
| <b>Co-MCM-48</b>                             | 0.50                                 | 5.90                    | 0.074                                                                                    | 0.042                  | 17               |
| <b>OV-CoO/CeO<sub>2</sub></b>                | <b>0.25</b>                          | <b>24.02</b>            | <b>0.174</b>                                                                             | <b>0.050</b>           | <b>This work</b> |

**Table S2.** Parameters of adsorption kinetics for Se adsorption.

|                                       |                                                    | Composites |        |                  |                     |                      |                         |
|---------------------------------------|----------------------------------------------------|------------|--------|------------------|---------------------|----------------------|-------------------------|
|                                       |                                                    | CoO        | OV-CoO | CeO <sub>2</sub> | OV-CeO <sub>2</sub> | CoO/CeO <sub>2</sub> | OV-CoO/CeO <sub>2</sub> |
| <b>Pseudo-first-order</b>             | $q_{e, cal}(mg \cdot g^{-1})$                      | 3.004      | 3.561  | 3.034            | 3.010               | 7.389                | 9.974                   |
|                                       | $k_1 \times 10^2 (min^{-1})$                       | 1.021      | 1.149  | 0.959            | 0.765               | 0.873                | 1.102                   |
|                                       | $R^2$                                              | 0.907      | 0.934  | 0.890            | 0.676               | 0.855                | 0.890                   |
| <b>Pseudo-second-order</b>            | $q_{e, cal}(mg \cdot g^{-1})$                      | 6.024      | 7.936  | 14.925           | 16.949              | 24.570               | 33.333                  |
|                                       | $k_2 \times 10^{-2} (g \cdot (mg \cdot min)^{-1})$ | 1.664      | 2.633  | 2.747            | 4.455               | 0.899                | 0.734                   |
|                                       | $R^2$                                              | 0.997      | 0.999  | 0.999            | 0.999               | 0.999                | 0.999                   |
| <b>Intra-Particle diffusion model</b> | $k_1 (mg \cdot g^{-1} \cdot min^{-1/2})$           | 1.046      | 3.002  | 8.458            | 9.423               | 6.994                | 11.323                  |
|                                       | $R^2$                                              | 0.981      | 0.936  | 0.990            | 0.954               | 0.999                | 0.960                   |
|                                       | $k_2 (mg \cdot g^{-1} \cdot min^{-1/2})$           | 0.533      | 0.495  | 0.359            | 0.526               | 1.063                | 2.277                   |
| <b>Particle diffusion model</b>       | $R^2$                                              | 0.990      | 0.985  | 0.891            | 0.986               | 0.943                | 0.997                   |
|                                       | $k_3 (mg \cdot g^{-1} \cdot min^{-1/2})$           | 0.099      | 0.092  | 0.080            | 0.028               | 0.250                | 0.240                   |
|                                       | $R^2$                                              | 0.822      | 0.887  | 0.849            | 0.640               | 0.705                | 0.955                   |

**Table S3.** Comparison of adsorbents for Se in reported literatures

| <b>Adsorbents</b>                    | <b>Adsorbent dosage (g·L<sup>-1</sup>)</b> | <b>Materials cost estimation (\$·t<sup>-1</sup>)</b> | <b>Adsorption capacity (mg·g<sup>-1</sup>) for Se</b> | <b>Adsorbent cost required for each ton of Se (\$·t<sup>-1</sup>)</b> | <b>Reference</b> |
|--------------------------------------|--------------------------------------------|------------------------------------------------------|-------------------------------------------------------|-----------------------------------------------------------------------|------------------|
| <b>CuFe<sub>2</sub>O<sub>4</sub></b> | 0.40                                       | 5344.8                                               | 14.10                                                 | 379063.8                                                              | 17               |
| <b>CoFe<sub>2</sub>O<sub>4</sub></b> | 0.40                                       | 9699.9                                               | 11.60                                                 | 836198.3                                                              | 17               |
| <b>MnFe<sub>2</sub>O<sub>4</sub></b> | 0.40                                       | 2842.9                                               | 3.90                                                  | 728948.7                                                              | 17               |
| <b>BC-ZVI</b>                        | 0.50                                       | 24757.9                                              | 62.52                                                 | 395999.7                                                              | 18               |
| <b>MGO</b>                           | 1.00                                       | 8002817                                              | 23.81                                                 | 336111591.8                                                           | 19               |
| <b>UiO-66-NH<sub>2</sub></b>         | 0.50                                       | 122916.6                                             | 26.80                                                 | 4586440.3                                                             | 20               |
| <b>MGO-PAA</b>                       | 0.015                                      | 17842285.1                                           | 120.10                                                | 148561907.6                                                           | 21               |
| <b>OV-CoO/CeO<sub>2</sub></b>        | <b>0.25</b>                                | <b>22767.4</b>                                       | <b>126.70</b>                                         | <b>179695.3</b>                                                       | <b>This work</b> |

**Table S4.** Langmuir and Freundlich isotherm fitting parameters for Se adsorption on OV-CoO/CeO<sub>2</sub>.

| Composite               | Langmuir                           |                                           |                                    |       | Freundlich                                            |       |       |
|-------------------------|------------------------------------|-------------------------------------------|------------------------------------|-------|-------------------------------------------------------|-------|-------|
|                         | $q_m(\text{mg}\cdot\text{g}^{-1})$ | Actual $q_m(\text{mg}\cdot\text{g}^{-1})$ | $K_L(\text{L}\cdot\text{mg}^{-1})$ | $R^2$ | $K_F(\text{mg}^{1-(1/n)}\text{L}^{1/n}\text{g}^{-1})$ | $R^2$ | n     |
| OV-CoO/CeO <sub>2</sub> | 175.454                            | 126.701                                   | 0.016                              | 0.971 | 10.452                                                | 0.992 | 2.021 |

**Table S5.** Dubinin-Radushkevich isotherm fitting parameters for Se adsorption on OV-CoO/CeO<sub>2</sub>.

| Composite               | D-R model                    |                                              |                             |                |
|-------------------------|------------------------------|----------------------------------------------|-----------------------------|----------------|
|                         | $Q_0$ (mol·g <sup>-1</sup> ) | $\beta$ (mol <sup>2</sup> ·J <sup>-2</sup> ) | $E$ (kJ·mol <sup>-1</sup> ) | R <sup>2</sup> |
| OV-CoO/CeO <sub>2</sub> | 6.090E-3                     | 4.916E-9                                     | 10.085                      | 0.992          |

**Table S6.** Parameters used for the empirical equation that describe solutions to the HSDM for a batch reactor for Freundlich adsorption intensity parameters (1/n)

| Composite               | HSDM                                                                              |                                         | Empirical Equation $C=A_0 + A_1 (\ln t)+A_2 (\ln t)^2+A_3 (\ln t)^3$ |           |        |        |         |         |
|-------------------------|-----------------------------------------------------------------------------------|-----------------------------------------|----------------------------------------------------------------------|-----------|--------|--------|---------|---------|
|                         | $K_L (\text{mg} \cdot \text{g}^{-1}) \cdot (\text{L} \cdot \text{mg}^{-1})^{1/n}$ | $D_s (\text{cm}^2 \cdot \text{s}^{-1})$ | Freundlich adsorption intensity parameter (1/n)                      | $C_e/C_0$ | $A_0$  | $A_1$  | $A_2$   | $A_3$   |
| OV-CoO/CeO <sub>2</sub> | 10.45                                                                             | 4.17E-13                                | 0.4948                                                               | 0.1       | 0.1139 | 0.1536 | 3.53E-3 | 5.30E-5 |

**Table S7.** Calculating Ds using mathematical solution to the HSDM

| t/min | Ct/C0       | Ct        | t-bar    | $\frac{Ct - Ce}{C_{data} = C0 - Ce}$ | C model     | $(\frac{C_{data} - C_{model}}{C_{data}})^2$ |
|-------|-------------|-----------|----------|--------------------------------------|-------------|---------------------------------------------|
| 5     | 0.595408529 | 5060972.5 | 2.10E-03 | 0.557054675                          | 0.889025371 | 3.55E-01                                    |
| 10    | 0.551634118 | 4688890   | 4.19E-03 | 0.509130603                          | 0.644416766 | 7.06E-02                                    |
| 15    | 0.529052353 | 4496945   | 6.29E-03 | 0.484408166                          | 0.519404777 | 5.22E-03                                    |
| 20    | 0.453954118 | 3858610   | 8.39E-03 | 0.402190881                          | 0.438890893 | 8.33E-03                                    |
| 30    | 0.365555588 | 3107222.5 | 1.26E-02 | 0.305412481                          | 0.337050066 | 1.07E-02                                    |
| 60    | 0.309836471 | 2633610   | 2.52E-02 | 0.244411386                          | 0.194835346 | 4.11E-02                                    |
| 90    | 0.249755    | 2122917.5 | 3.77E-02 | 0.178634402                          | 0.130519284 | 7.25E-02                                    |
| 120   | 0.205196176 | 1744167.5 | 5.03E-02 | 0.129851558                          | 0.093427673 | 7.87E-02                                    |
| 150   | 0.174182941 | 1480555   | 6.29E-02 | 0.095898377                          | 0.069574592 | 7.53E-02                                    |
| 180   | 0.151241765 | 1285555   | 7.55E-02 | 0.070782457                          | 0.053291431 | 6.11E-02                                    |
| 210   | 0.133872647 | 1137917.5 | 8.80E-02 | 0.051766808                          | 0.041783463 | 3.72E-02                                    |

**Table S8.** Flue Gas Desulfurization Wastewater Characteristics

| Parameter                  | Typical influent range (mg·L <sup>-1</sup> ) | References |
|----------------------------|----------------------------------------------|------------|
| Cadmium (Cd)               | 0.05-0.1                                     | 23, 24     |
| Chromium (Cr)              | 0.3-1                                        | 24, 25     |
| Mercury (Hg)               | 0.01-0.8                                     | 26, 27     |
| Lead (Pb)                  | 0.5-1.5                                      | 25         |
| Copper (Cu)                | 0.2-0.8                                      | 28         |
| Magnesium (Mg)             | 50-4000                                      | 28         |
| Chloride (Cl)              | 10000-25000                                  | 29         |
| Nitrate (NO <sub>3</sub> ) | 30-120                                       | 26         |
| Selenium (Se)              | 1-4                                          | 24, 26, 29 |

**Table S9.** Pore diameter, pore volume and BET surface area of the different materials.

| <b>Catalysts</b>              | <b>Average Pore<br/>Diameter (nm)</b> | <b>Pore Volume<br/>(cm<sup>3</sup>/g)</b> | <b>BET Surface<br/>Area (cm<sup>2</sup>/g)</b> |
|-------------------------------|---------------------------------------|-------------------------------------------|------------------------------------------------|
| CoO                           | 21.348                                | 0.067                                     | 12.638                                         |
| OV-CoO                        | 15.958                                | 0.0428                                    | 10.729                                         |
| CeO <sub>2</sub>              | 12.227                                | 0.174                                     | 57.032                                         |
| OV-CeO <sub>2</sub>           | 12.959                                | 0.231                                     | 71.215                                         |
| 70wt% CoO/CeO <sub>2</sub>    | 8.771                                 | 0.123                                     | 56.206                                         |
| 70wt% OV-CoO/CeO <sub>2</sub> | 9.232                                 | 0.137                                     | 59.175                                         |

**Table S10.** Ratios of Co, Ce, and O species on the surface of five different kinds of catalysts.

| Sample                         | Co 2p                |                     | Ce 3d                |                      | O 1s              |                   |                   |
|--------------------------------|----------------------|---------------------|----------------------|----------------------|-------------------|-------------------|-------------------|
|                                | Co <sup>2+</sup> /Co | Co <sup>0</sup> /Co | Ce <sup>3+</sup> /Ce | Ce <sup>4+</sup> /Ce | O <sub>α</sub> /O | O <sub>β</sub> /O | O <sub>Γ</sub> /O |
| 10 wt% OV-CoO/CeO <sub>2</sub> | 87.42%               | 12.58%              | 21.27%               | 78.73%               | 44.13%            | 47.13%            | 8.74%             |
| 30 wt% OV-CoO/CeO <sub>2</sub> | 87.40%               | 12.60%              | 24.87%               | 75.13%               | 33.78%            | 52.52%            | 13.70%            |
| 50 wt% OV-CoO/CeO <sub>2</sub> | 87.05%               | 12.95%              | 29.00%               | 71.00%               | 24.71%            | 59.52%            | 15.77%            |
| 70 wt% OV-CoO/CeO <sub>2</sub> | 87.66%               | 12.33%              | 40.77%               | 59.23%               | 22.33%            | 67.48%            | 10.62%            |
| 90 wt% OV-CoO/CeO <sub>2</sub> | 80.41%               | 19.69%              | 20.69%               | 79.31%               | 32.63%            | 55.74%            | 11.63%            |

**Table S11.** Ratios of Co, Ce, and O species on the surface of OV-CoO/CeO<sub>2</sub> before and after catalysis/adsorption.

| Sample                                      | Co 2p                |                     | Ce 3d                |                      | O 1s              |                   |                   |
|---------------------------------------------|----------------------|---------------------|----------------------|----------------------|-------------------|-------------------|-------------------|
|                                             | Co <sup>2+</sup> /Co | Co <sup>0</sup> /Co | Ce <sup>3+</sup> /Ce | Ce <sup>4+</sup> /Ce | O <sub>α</sub> /O | O <sub>β</sub> /O | O <sub>Γ</sub> /O |
| OV-CoO/CeO <sub>2</sub>                     | 87.66%               | 12.33%              | 40.77%               | 59.23%               | 22.33%            | 67.48%            | 10.62%            |
| OV-CoO/CeO <sub>2</sub> after<br>catalysis  | 93.63%               | 6.37%               | 38.71%               | 61.29%               | 35.77%            | 64.54%            | 0.69%             |
| OV-CoO/CeO <sub>2</sub> after<br>adsorption | 90.04%               | 9.96%               | 34.45%               | 65.56%               | 50.05%            | 47.09%            | 2.86%             |

## References

1. L. D. Wang, T. Y. Qi, S. Y. Wu, S. H. Zhang, D. Qi and H. N. Xiao, *Journal of Materials Chemistry A*, 2017, **5**, 8018-8028.
2. M. Badruzzaman, P. Westerhoff and D. R. U. Knappe, *Water Res.*, 2004, **38**, 4002-4012.
3. X. P. Min, D. Trujillo, J. W. Huo, Q. Q. Dong and Y. Wang, *Chem. Eng. J.*, 2020, **396**.
4. K. Gupta and U. C. Ghosh, *J. Hazard. Mater.*, 2009, **161**, 884-892.
5. C. H. Liu, Y. H. Chuang, T. Y. Chen, Y. Tian, H. Li, M. K. Wang and W. Zhang, *Environ. Sci. Technol.*, 2015, **49**, 7726-7734.
6. X. Jin, Y. Duan, D. P. Liu, X. L. Feng, W. Li, Z. Zhang and Y. Zhang, *Acs Applied Nano Materials*, 2019, **2**, 5769-5778.
7. K. X. Fu, X. Liu, C. Y. Lv, J. M. Luo, M. X. Sun, S. L. Luo and J. C. Crittenden, *Environ. Sci. Technol.*, 2022, **56**, 2677-2688.
8. J. M. Luo, M. Sun, C. L. Ritt, X. Liu, Y. Pei, J. C. Crittenden and M. Elimelech, *Environ. Sci. Technol.*, 2019, **53**, 2075.
9. J. Luo, X. Luo, J. Crittenden, J. Qu, Y. Bai, Y. Peng and J. Li, *Environ. Sci. Technol.*, 2015, **49**, 11115-11124.
10. Q. Zhang, J. Crittenden, K. Hristovski, D. Hand and P. Westerhoff, *Water Res.*, 2009, **43**, 1859-1866.
11. M. Usman, M. Zarebanadkouki, M. Waseem, I. A. Katsoyiannis and M. Ernst, *J. Hazard. Mater.*, 2020, **400**, 123221.
12. L. Xing, J. Liu, T. Qi, L. Wang, Z. Wang and S. Zhang, *Applied Catalysis B-Environmental*, 2020, **275**.
13. M. Li, T. Qi, R. Yang, H.-N. Xiao, Z. Fang, S. A. Hodge, T. D. James, L. Wang and B. Mao, *Journal*

*of Materials Chemistry A*, 2018, **6**, 11296-11305.

14. M. Li, Q. Guo, L. Xing, L. Yang, T. Qi, P. Xu, S. Zhang and L. Wang, *Journal of Colloid and Interface Science*, 2020, **559**, 88-95.
15. T. Y. Qi, L. D. Wang, Y. G. Wang, L. Xing, L. Zhang, J. Liu, H. N. Xiao and S. H. Zhang, *Environ. Sci. Technol.*, 2019, **53**, 13477-13485.
16. T. Y. Qi, L. Xing, Z. M. Fang, L. Zhang, H. N. Xiao and L. D. Wang, *Journal of Materials Chemistry A*, 2021, **9**, 13288-13296.
17. L. Wang, L. Xing, J. Liu, T. Qi, S. Zhang, Y. Ma and P. Ning, *Chem. Eng. J.*, 2021, **407**.
18. W. Sun, W. Pan, F. Wang and N. Xu, *Chem. Eng. J.*, 2015, **273**, 353-362.
19. G. Tan, Y. Mao, H. Wang, M. Junaid and N. Xu, *Environmental Science and Pollution Research*, 2019, **26**, 21609-21618.
20. Y. Fu, J. Wang, Q. Liu and H. Zeng, *Carbon*, 2014, **77**, 710-721.
21. J. Wei, W. Zhang, W. Pan, C. Li and W. Sun, *Environmental Science-Nano*, 2018, **5**, 1441-1453.
22. Z. Lu, J. Yu, H. Zeng and Q. Liu, *Separation and Purification Technology*, 2017, **183**, 249-257.
23. L. C. Staicu, N. Morin-Crini and G. Crini, *Chemosphere*, 2017, **172**, 111-119.
24. W. L. Zhang, H. Oswal, J. E. Renew, B. Gallagher, K. Ellison and C. H. Huang, *J. Hazard. Mater.*, 2020, **384**.
25. F. Franco, M. Benitez-Guerrero, I. Gonzalez-Trivino, R. Perez-Recuerda, C. Assiego, J. Cifuentes-Melchor and J. Pascual-Cosp, *Appl. Clay Sci.*, 2016, **119**, 321-332.
26. Y. H. Huang, P. K. Peddi, C. Tang, H. Zeng and X. Teng, *Separation and Purification Technology*, 2013, **118**, 690-698.
27. S. Zhao, D. Pudasainee, Y. Duan, R. Gupta, M. Liu and J. Lu, *Progress in Energy and Combustion*

*Science*, 2019, **73**, 26-64.

28. P. Cordoba, O. Font, M. Izquierdo, X. Querol, C. Leiva, M. A. Lopez-Anton, M. Diaz-Somoano, R. Ochoa-Gonzalez, M. R. Martinez-Tarazona and P. Gomez, *Fuel*, 2012, **102**, 773-788.
29. C.-M. Cheng, P. Hack, P. Chu, Y.-N. Chang, T.-Y. Lin, C.-S. Ko, P.-H. Chiang, C.-C. He, Y.-M. Lai and W.-P. Pan, *Energy Fuels*, 2009, **23**, 4805-4816.
